# Supplementary material
Source: publisher figshare collection journal article supplement (https://sage.figshare.com/ndownloader/files/36009521)
Supplement: Supplementary file 1 [file 36009521]

| **Sex: Male** | | **Total Instances Observed** | | | **Incidence Range** | | |
| --- | --- | --- | --- | --- | --- | --- | --- |
| **Tissue** | **Observation** | **Cambodian** | **Chinese** | **Vietnamese** | **Cambodian** | **Chinese** | **Vietnamese** |
| Skin | Alopecia/Hypotrichosis | - | 1 (0.16%), N=616 | - | - | [0-20.00%] | - |
| Cyst | - | 1 (0.16%), N=616 | - | - | [0-10.00%] | - |
| Edema | 2 (0.87%), N=231 | - | - | [0-20.00%] | - | - |
| Erosion/Ulcer | 1 (0.43%), N=231 | 2 (0.32%), N=616 | - | [0-12.50%] | [0-20.00%] | - |
| Exudate | 2 (0.87%), N=231 | 3 (0.49%), N=616 | 1 (0.96%), N=104 | [0-20.00%] | [0-25.00%] | [0-20.00%] |
| Fibrosis | - | 1 (0.16%), N=616 | 1 (0.96%), N=104 | - | [0-16.67%] | [0-11.11%] |
| Granuloma | - | 1 (0.16%), N=616 | - | - | [0-16.67%] | - |
| Hemorrhage | 7 (3.03%), N=231 | 17 (2.76%), N=616 | 4 (3.85%), N=104 | [0-40.00%] | [0-100.00%] | [0-40.00%] |
| Infiltrate, (Mononuclear Cell) | 2 (0.87%), N=231 | 10 (1.62%), N=616 | 1 (0.96%), N=104 | [0-20.00%] | [0-40.00%] | [0-20.00%] |
| Inflammation | 4 (1.73%), N=231 | 18 (2.92%), N=616 | 4 (3.85%), N=104 | [0-25.00%] | [0-100.00%] | [0-40.00%] |

| **Sex: Female** | | **Total Instances Observed** | | | **Incidence Range** | | |
| --- | --- | --- | --- | --- | --- | --- | --- |
| **Tissue** | **Observation** | **Cambodian** | **Chinese** | **Vietnamese** | **Cambodian** | **Chinese** | **Vietnamese** |
| Skin | Abscess | 1 (0.44%), N=225 | - | - | [0-25.00%] | - | - |
| Alopecia/Hypotrichosis | - | 3 (0.48%), N=626 | - | - | [0-20.00%] | - |
| Cyst | - | 1 (0.16%), N=626 | - | - | [0-16.67%] | - |
| Degeneration/Necrosis | - | 2 (0.32%), N=626 | - | - | [0-16.67%] | - |
| Edema | 1 (0.44%), N=225 | - | - | [0-25.00%] | - | - |
| Erosion/Ulcer | 1 (0.44%), N=225 | 8 (1.28%), N=626 | - | [0-25.00%] | [0-33.33%] | - |
| Exudate | 1 (0.44%), N=225 | 7 (1.12%), N=626 | - | [0-16.67%] | [0-33.33%] | - |
| Fibrosis | 1 (0.44%), N=225 | 1 (0.16%), N=626 | - | [0-20.00%] | [0-20.00%] | - |
| Foreign Material | - | 1 (0.16%), N=626 | - | - | [0-11.11%] | - |
| Hemorrhage | 4 (1.78%), N=225 | 14 (2.24%), N=626 | 2 (2%), N=100 | [0-60.00%] | [0-66.67%] | [0-40.00%] |
| Infiltrate, (Mononuclear Cell) | 3 (1.33%), N=225 | 7 (1.12%), N=626 | - | [0-25.00%] | [0-25.00%] | - |
| Inflammation | 6 (2.67%), N=225 | 17 (2.72%), N=626 | 2 (2%), N=100 | [0-60.00%] | [0-33.33%] | [0-40.00%] |
